# Supplementary material
Source: MDPI journal article supplement (https://www.mdpi.com/2073-4441/14/24/4125)
Supplement: s1 [file s1 › water-2057523-supplementary.pdf]

Supplementary material for

# Preparation of magnetic dummy molecularly imprinted mesoporous silica nanoparticles using semi-covalent imprinting approach for rapid and selective removal of bisphenols from environmental water samples

Jing Chen, Xiaoli Sun\*, Muhua Wang<sup>1</sup>, Yan Wang, Qinyao Wu<sup>1</sup>, Shurong Wu<sup>1</sup>, Sisi Fang

Department of Chemistry, Lishui University, Lishui 323000, China

Corresponding Author: [sxl2015@lsu.edu.cn](mailto:sxl2015@lsu.edu.cn)

## 1. Preparation of MISMS and NISMS

### 1.1 Preparation of MISMS

The PP-MISMS THPE-MISMS and BPA-MISMS was synthesized by a modified method based on the published literature (<https://doi.org/10.1021/jp908828q>). In a typical procedure, 1.5 g of lecithin and 0.3 g of dodecylamine in were dissolved in 28 mL ethanol, then 21 mL of water was added slowly under stirring to a solution containing until a homogeneous emulsion was formed. To this emulsion, 16.5 mmol TEOS pre-dissolved with 1.5 mmol of template-monomer complex (PP-ICPTES, THPE-ICPTES or BPA-ICPTES) were added slowly under stirring for 15 min, and then the mixture was left under static conditions for 24 h at room temperature. The as-synthesized MISMS powder was filtrated, rinsed with ethanol, and then washed free of lecithin and dodecylamine by Soxhlet extraction with ethanol for 24 h. The obtained powder was refluxed in DMSO and water (5:1, v/v) at 180 °C for more than 3 hours to remove template molecule and dried overnight under vacuum.

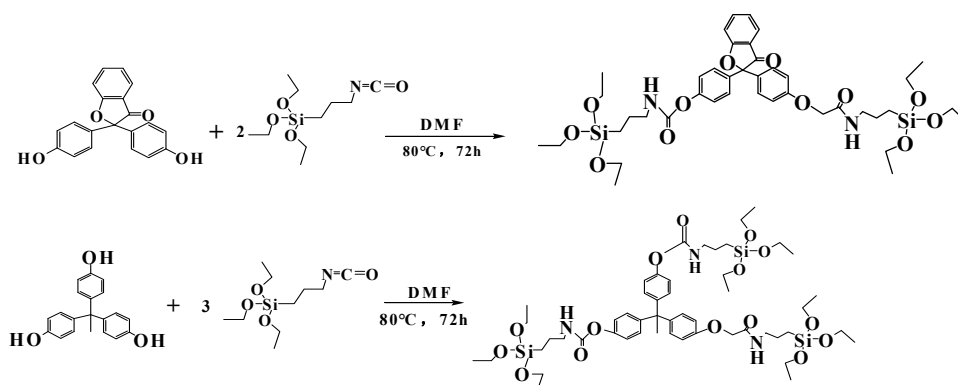

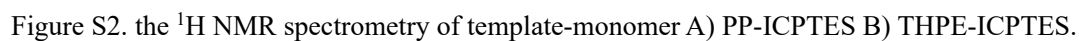

Table S1. The results of nitrogen sorption measurement.

| Samples    | Specific surface area ( $\text{m}^2 \text{g}^{-1}$ ) | Pore volume ( $\text{m}^3 \text{g}^{-1}$ ) |
|------------|------------------------------------------------------|--------------------------------------------|
| PP-MISMS   | 718.6                                                | 0.7177                                     |
| THPE-MISMS | 690.9                                                | 0.8119                                     |
| BPA-MISMS  | 700.1                                                | 0.8223                                     |
| NISMS1     | 772.7                                                | 0.8672                                     |
| NISMS2     | 750.4                                                | 0.8554                                     |

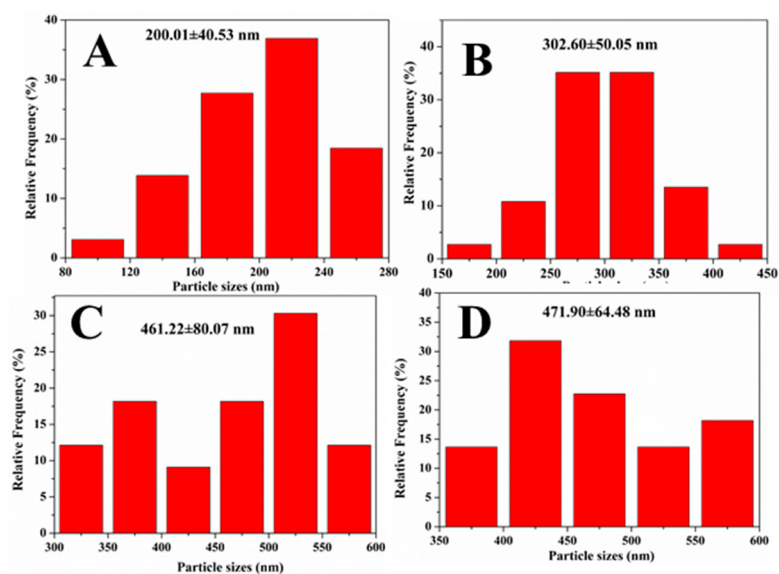

Figure S3. size distribution histogram TEM image (A)  $\text{Fe}_3\text{O}_4$ ; (B)  $\text{Fe}_3\text{O}_4@\text{SiO}_2$ ; (C) m-NI-MSNPs; (D) m-DMI-MSNPs.

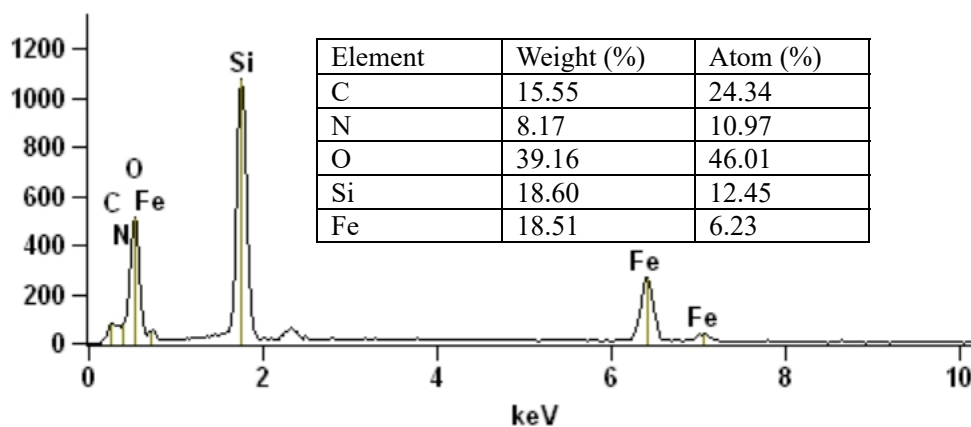

Figure S4. EDX spectrum of m-DMI-MSNPs.

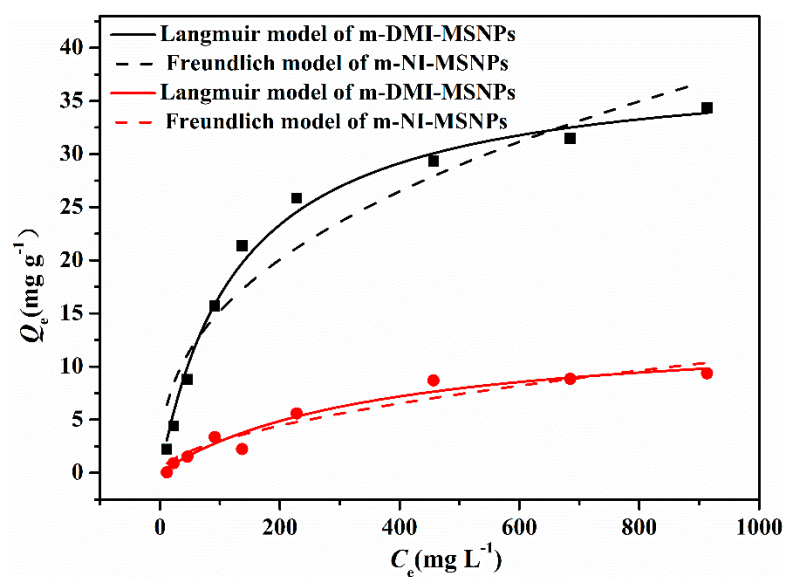

Figure S5. Adsorption isotherms of BPA on m-DMI-MSNPs and m-NI-MSNPs.

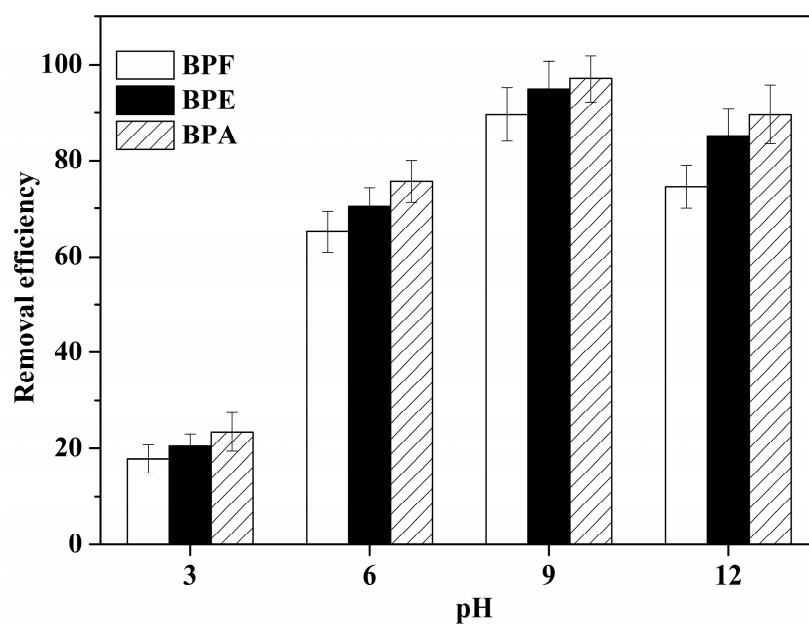

Figure S6. Effect of pH on adsorption of BPs.

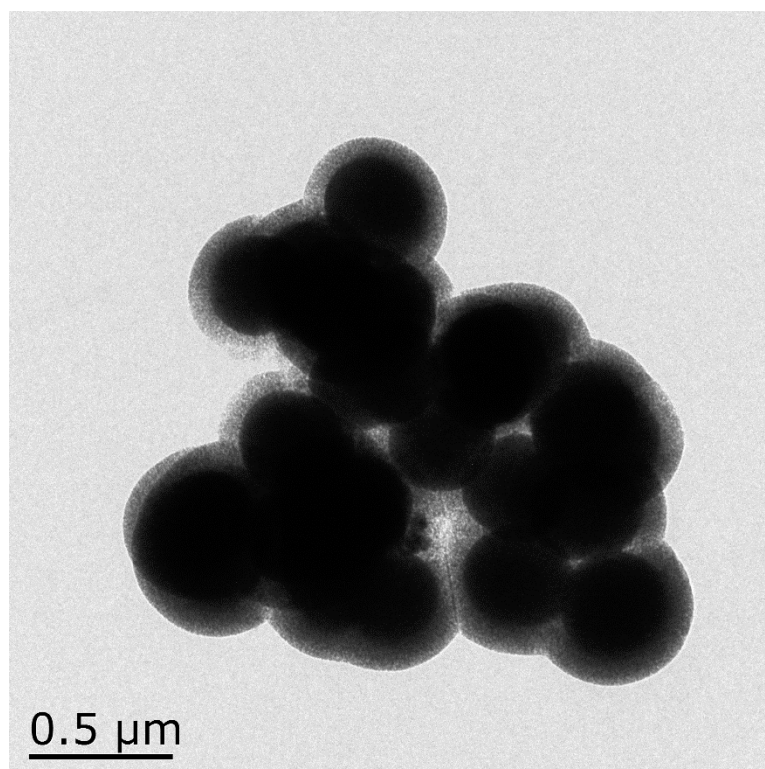

Figure S7. TEM images of particle after adsorption and regeneration of m- DMI-MSNPs.
